# Supplementary material for: Medical and Infectious Complications Associated with Pyelonephritis among Pregnant Women at Delivery
Source: Hindawi journal article supplement (doi:10.1155/2013/124102), 2013-01-01
Supplement: f1 [file 124102.f1.pdf]

Supplemental Table 1. ICD-9 codes for pre-existing medical conditions, medical events, and obstetric complications utilized to identify cases in the NIS 2008 – 2010.

| Medical Condition                                                                  | ICD-9 codes                                                                   |
|------------------------------------------------------------------------------------|-------------------------------------------------------------------------------|
| <b>Heart Disease</b>                                                               |                                                                               |
| Cardiomyopathy                                                                     | 425.x, 674.5                                                                  |
| Valvular heart disease                                                             | 394-397, 424, 785.2, 785.3, V42.2                                             |
| <b>Pulmonary Disease</b>                                                           |                                                                               |
| Asthma                                                                             | 493                                                                           |
| <b>Endocrine</b>                                                                   |                                                                               |
| Diabetes (non-gestational)                                                         | 249, 250, 648.0                                                               |
| Thyroid disease                                                                    | 240-246, 648.1                                                                |
| <b>Autoimmune</b>                                                                  |                                                                               |
| Systemic lupus erythema.                                                           | 710.0, 695.4, 583.8                                                           |
| <b>Hematologic</b>                                                                 |                                                                               |
| Thrombophilia (includes history of thrombosis and antiphospholipid syndrome [APS]) | 273.8, 286.53, 286.9, 289.81, 289.82, 289.9, 795.79, V12.51                   |
| Anemia                                                                             | 648.2x, 285.x                                                                 |
| Thrombocytopenia                                                                   | 287.3x, 287.4x, 287.5x                                                        |
| Sickle cell/thalassemia                                                            | 282.4-282.49, 282.6-282.69                                                    |
| <b>Drug/Alcohol/Tobacco</b>                                                        |                                                                               |
| Drug use                                                                           | 292, 304, 305.2x-305.9x, 655.5x, 760.70, 760.72-760.75, 779.5, 965.0x, V65.42 |

|                                           |                                            |
|-------------------------------------------|--------------------------------------------|
| Alcohol use                               | 291, 303, 305.0x, 760.71, 980.0x           |
| Smoking                                   | 305.1, V15.82, 649.0x                      |
| <b>Chronic hypertension/renal failure</b> |                                            |
| Chronic Hypertension                      | 401-405, 437.2, 642.0-642.2                |
| Chronic Renal Failure                     | 585, 792.5, V42.0, V45.1, V56              |
|                                           |                                            |
| <b>Event or Condition</b>                 |                                            |
| Mechanical Ventilation                    | Procedure codes: 93.90, 96.01-96.05, 96.7x |
| Transfusion                               | Procedure codes: 99.00-99.09               |
| <b>Cardiac Event</b>                      |                                            |
| Acute heart failure                       | 428                                        |
| <b>Pulmonary Event</b>                    |                                            |
| Pneumonia                                 | 480-486, 487.0                             |
| Pulmonary edema                           | 518.4                                      |
| ARDS                                      | 518.5                                      |
| <b>Thromboembolic Event</b>               |                                            |
| Pulmonary embolism                        | 415.1x, 673.x                              |
| Deep venous thrombosis                    | 451.1x, 451.2x, 671.3x, 671.4x             |
| <b>Infections</b>                         |                                            |
| Sepsis                                    | 038, 790.7                                 |
| <b>Renal Event</b>                        |                                            |

|                                                     |                                          |
|-----------------------------------------------------|------------------------------------------|
| Acute renal failure                                 | 584, 639.3x, 669.3x                      |
| <b>Obstetric Events</b>                             |                                          |
| Cesarean delivery                                   | Procedure codes: 74, DRG 765, DRG 766    |
| Operative vaginal delivery                          | Procedure codes: 720-724, 726, 727-727.9 |
| Multiple Gestation                                  | 651, 652.6                               |
| Gestational diabetes                                | 648.8x                                   |
| Preeclampsia, eclampsia or gestational hypertension | 642.3-642.7                              |
| Preterm labor                                       | 644                                      |
| Premature rupture of membranes                      | 658.1x                                   |
| Postpartum hemorrhage                               | 666-666.2x                               |
| Chorioamnionitis                                    | 658.4x, 659.2x                           |
|                                                     |                                          |
